# Supplementary material
Source: PubMed Central journal article supplement (PMC8127493)
Supplement: 43678_2021_129_MOESM1_ESM.pdf [file 43678_2021_129_MOESM1_ESM.pdf]

# PERC physicians pandemic survey

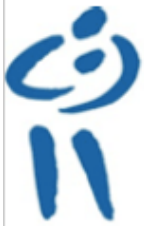

**CHU Sainte-Justine**  
Le centre hospitalier  
universitaire mère-enfant

Université   
de Montréal

Invitation to participate in a research project (French below)

Experiences of Canadian physicians during the COVID-19 pandemic: a survey study

The COVID-19 pandemic has been a major issue for front-line healthcare professionals and few studies to date have studied the perspective of emergency room physicians in this context. As a member of the Pediatric Emergency Research Canada group (PERC) or the Canadian Association of Emergency Physicians (CAEP), we are inviting you to participate in this survey study. All PERC and CAEP members are invited to participate.

The survey takes approximately 15 minutes to complete. A reminder will be sent to you in 4 and 8 days, whether or not you have completed the survey. Apart from the time taken to complete the study, this project has no other disadvantages for you. You will not receive any direct benefit from participating in this research. We hope that the knowledge acquired through this research project will be useful in identifying possible solutions for physicians in future outbreaks.

All the information collected will be kept confidential to the extent provided by law. Your identity will be protected by replacing your name with a code. Only an arm's-length research assistant at CHU Sainte-Justine will have access to the link between the code and your name.

In order to ensure the proper conduct of the research and your protection, the CHU Sainte-Justine Research Ethics Committee or a person authorized by it may consult your research file. It adheres to a confidentiality policy. If the general results of this research project are published or presented at scientific conferences, your name and other personal information will not be used. The research data will be kept securely for 7 years under the responsibility of Dr. Nathalie Gaucher, at the CHU Sainte-Justine.

Participation in this research project is voluntary. You are free to refuse to participate in this research project. You can decide to stop participating in the research project at any time and your data will be included for analysis. If you have any questions regarding the research project, you can contact the researcher responsible for the project, Dr. Nathalie Gaucher, at 514-345-4931, extension 5885, or [nathalie.orr.gaucher@umontreal.ca](mailto:nathalie.orr.gaucher@umontreal.ca)

The CHU Sainte-Justine research ethics committee has approved and is monitoring this research project. By completing the survey, you agree to participate in the project.

---

## Invitation à participer à un projet de recherche

### Expériences des médecins canadiens pendant la pandémie à COVID-19 : une étude par questionnaire

La pandémie à COVID-19 est un enjeu majeur pour les soignants de la première ligne et peu d'études à ce jour n'ont étudié la perspective des médecins d'urgence dans ce contexte. C'est ainsi que nous sollicitons aujourd'hui votre participation en tant que membre du Pediatric Emergency Research Canada group (PERC) ou de l'Association Canadienne des Médecins d'Urgence (ACMU). L'ensemble des membres du PERC et de l'ACMU sont invités à participer.

Le questionnaire prend environ 15 minutes à compléter. Un rappel vous sera renvoyé dans 4 et 8 jours que vous ayez complété le questionnaire ou non. Hormis le temps mis à compléter le questionnaire, ce projet ne comporte aucun autre inconvénient pour vous. Vous ne retirerez aucun avantage direct en participant à cette recherche. Nous espérons que les connaissances acquises grâce à ce projet de recherche seront utiles à identifier des pistes de solution pour les médecins d'urgence lors d'éclipsions futures.

Tous les renseignements recueillis demeureront confidentiels dans les limites prévues par la loi. Votre identité sera protégée en remplaçant votre nom par un code de recherche. Seul un assistant de recherche du CHU Sainte-Justine, indépendant de l'équipe de recherche, aura accès au lien entre le code et votre nom.

Afin de vérifier le bon déroulement de la recherche et d'assurer votre protection, le Comité d'éthique de la recherche du CHU Sainte-Justine ou une personne mandatée par celui-ci pourrait consulter votre dossier de recherche. Il adhère à une politique de confidentialité. Si les résultats généraux de ce projet de recherche sont publiés ou présentés lors de conférences scientifiques, votre nom et vos autres renseignements personnels ne seront pas utilisés. Les données de recherche seront conservées pendant 7 ans de façon sécuritaire sous la responsabilité de Dr. Nathalie Gaucher, au CHU Sainte-Justine.

La participation à ce projet de recherche est volontaire. Vous êtes libre de refuser d'y participer. Vous pouvez décider de cesser de participer au projet de recherche à n'importe quel moment et les données colligées seront incluses dans l'analyse.

Si vous avez des questions concernant le projet de recherche, vous pouvez communiquer avec le chercheur responsable du projet Dr. Nathalie Gaucher, au 514-345-4931, poste 5885 ou [nathalie.orr.gaucher@umontreal.ca](mailto:nathalie.orr.gaucher@umontreal.ca).

Le comité d'éthique de la recherche du CHU Sainte-Justine a approuvé ce projet de recherche et en assure le suivi.

En complétant le questionnaire, vous consentez à participer au projet.

---

This survey is being conducted through both the PERC and CAEP. We ask that you please answer the survey only once, even if you receive invitations from both associations.

Ce questionnaire est distribué par le PERC et l'ACMU. Nous vous demandons de le compléter une seule fois, même si vous recevez l'invitation de la part des deux associations. Merci.

---

Among the following professional associations, which are you currently a member of?  
Parmi les associations professionnelles suivantes, de laquelle/lesquelles êtes-vous membre ?

- PERC (including pediatric emergency medicine residents or fellows) / PERC (incluant résidents ou fellows en médecine d'urgence pédiatrique)
- CAEP / ACMU
- CAEP and PERC (including pediatric emergency medicine residents or fellows) / ACMU et PERC (incluant résidents ou fellows en médecine d'urgence pédiatrique)

**SECTION 1 : CLINICAL PRACTICE / PRATIQUE CLINIQUE****1. During this pandemic, how clear was the information you received from:****Pendant cette pandémie, l'information reçue était-elle claire de la part de :**

|                                                                                    | Not clear at all/ Pas<br>claire du tout | Not clear/ Pas claire | Clear/ Claire         | Perfectly clear/<br>Parfaitement claire |
|------------------------------------------------------------------------------------|-----------------------------------------|-----------------------|-----------------------|-----------------------------------------|
| Your health authority or<br>hospital?/ Votre hopital ou<br>organisation de santé ? | <input type="radio"/>                   | <input type="radio"/> | <input type="radio"/> | <input type="radio"/>                   |
| Your public health agency?/<br>Votre direction de santé<br>publique ?              | <input type="radio"/>                   | <input type="radio"/> | <input type="radio"/> | <input type="radio"/>                   |
| Your provincial health minister?/<br>Votre ministère de la santé ?                 | <input type="radio"/>                   | <input type="radio"/> | <input type="radio"/> | <input type="radio"/>                   |
| Your federal government?/<br>Votre gouvernement fédéral ?                          | <input type="radio"/>                   | <input type="radio"/> | <input type="radio"/> | <input type="radio"/>                   |

**SECTION 1 : CLINICAL PRACTICE / PRATIQUE CLINIQUE**

2 Please identify two (2) barriers to providing emergency care you experienced during this pandemic:  
Veuillez identifier deux (2) obstacles à prodiguer des soins en médecine d'urgence que vous avez vécu pendant cette pandémie :

1. \_\_\_\_\_

2. \_\_\_\_\_

3 Please identify two (2) facilitators to providing emergency care you experienced during this pandemic:  
Veuillez identifier deux (2) facilitateurs à prodiguer des soins en médecine d'urgence que vous avez vécu pendant cette pandémie :

1. \_\_\_\_\_

2. \_\_\_\_\_

**SECTION 1 : CLINICAL PRACTICE / PRATIQUE CLINIQUE**

4 How have concerns of contracting COVID-19 changed how you interact with patients and families?  
Comment vos préoccupations liées à contracter la COVID-19 ont-elles changé votre façon d'interagir avec les patients et les familles ?

5 How has the use of PPE changed how you interact with patients and families?  
Comment l'utilisation d'EPI a-t-elle changé la façon dont vous interagissez avec les patients et les familles?

6 Identify up to 3 ways that the physician-patient relationship has been altered by this pandemic:  
Identifiez jusqu'à 3 éléments de la relation patient-médecin qui ont été modifiés par la pandémie :

1. \_\_\_\_\_

2. \_\_\_\_\_

3. \_\_\_\_\_

7 In the context of this pandemic, to date, have you had to perform clinical skills outside of your usual practice?  
Dans le contexte de cette pandémie, à ce jour, avez-vous eu à accomplir des tâches cliniques à l'extérieur de votre champ de pratique habituel ?

- No / Non  
 Yes / Oui

Please describe these skills:  
SVP décrivez ces tâches cliniques :

How did you feel accomplishing these skills?  
Comment vous êtes-vous senti en accomplissant ces tâches cliniques ?

In the context of this pandemic, do you believe you will have to perform clinical skills outside of your usual practice, in the future?  
Dans le contexte de cette pandémie, croyez-vous que vous aurez à accomplir des tâches cliniques à l'extérieur de votre champ de pratique habituel ?

- No / Non  
 Yes / Oui

- 
- 8 How concerned are you about potential medical legal consequences to practicing outside of your usual scope of practice in the context of this pandemic?  
À quel point êtes-vous préoccupé des conséquences médico-légales d'avoir à pratiquer à l'extérieur de votre champ de pratique habituel dans le contexte de cette pandémie ?
- Not concerned at all / <font color=black>Pas préoccupé du tout<font color=white>
- Extremely concerned /<font color=black> Extrêmement préoccupé
- \_\_\_\_\_
- (Place a mark on the scale above)
- 
- 9 How much do you believe the Canadian Medical Protection Association (CMPA) will protect you if you perform clinical skills outside of your usual practice?  
À quel point croyez-vous que l'Association Canadienne de Protection Médicale (ACPM) vous protégera si vous accomplissez des tâches cliniques à l'extérieur de votre champ de pratique habituel ?
- No protection at all /<font color=black>Aucune protection<font color=white>
- Complete protection /<font color=black> Protection complète
- \_\_\_\_\_
- (Place a mark on the scale above)
- 
- 10 In the context of this pandemic, has there been a change in the number of ED shifts you do, in comparison to your usual clinical practice?  
Dans le contexte de cette pandémie, est-ce qu'il y a eu un changement dans le nombre de quarts de travail que vous effectuez à l'urgence par rapport à votre charge de travail clinique habituelle ?
- No change / Non, aucun changement
- Yes, fewer shifts / Oui, moins de shifts
- Yes, more shifts / Oui, plus de shifts
- 
- 11 In the context of this pandemic, has there been a change in the amount of time you spend doing non-clinical work, in comparison to your usual practice?  
Dans le contexte de cette pandémie, est-ce qu'il y a eu un changement dans la quantité de temps que vous passez sur des tâches non-cliniques par rapport à votre pratique habituelle ?
- No change / Non, aucun changement
- Yes, less time spent non-clinically / Oui, moins de temps non-clinique
- Yes, more time spent non-clinically / Oui, plus de temps non-clinique
- 
- Feel free to comment: / Veuillez commenter au besoin : \_\_\_\_\_
- 
- 12 In the context of this pandemic, has your income changed? / Dans le contexte de cette pandémie, est-ce que votre revenu a changé ?
- No change in income / Non, pas de changement de revenu
- Yes, less income / Oui, moins de revenu
- Yes, more income / Oui, plus de revenu

**SECTION 1 : CLINICAL PRACTICE / PRATIQUE CLINIQUE**

**13. Regarding each of the following ethical issues, which of the suggested answers best represent your experiences with this pandemic? (Check all that apply)**

**Pour chacun des enjeux éthiques suivants, quelles réponses représentent le mieux vos expériences avec cette pandémie ? (Cochez toutes les réponses applicables)**

To date, I have already encountered this issue / À ce jour, j'ai déjà rencontré cet enjeu.

In this pandemic's future, I believe I will encounter this issue or that it will be an ongoing issue. / Dans le futur de cette pandémie, je crois que je rencontrerai cet enjeu ou que ça sera un enjeu récurrent.

I have not encountered and I do not believe I will encounter this issue during this pandemic. / Je n'ai pas rencontré cet enjeu et je ne crois pas le rencontrer pendant cette pandémie.

Balancing personal risk of contracting COVID-19 with responsibility to care for patients / Équilibrer le risque personnel de contracter la COVID-19 et la responsabilité de soigner les patients

Decrease in patient safety to protect healthcare teams / Diminution de la sécurité des patients pour protéger les équipes soignantes

Decrease in quality of patient care to protect healthcare teams / Diminution de la qualité des soins aux patients pour protéger les équipes soignantes

Allocation of scarce intensive care beds and/or respirators / Allocation de lits de soins intensifs et/ou respirateurs en nombre limité

ED team conflicts regarding different perceptions of risk of contracting COVID-19 / Conflits d'équipes à l'urgence sur des perceptions différentes du risque de contracter la COVID-19

|                                                                                                                                                                                                                                                                   |                          |                          |                          |
|-------------------------------------------------------------------------------------------------------------------------------------------------------------------------------------------------------------------------------------------------------------------|--------------------------|--------------------------|--------------------------|
| Changes in hospital visiting policies causing additional distress to families / Changements des politiques de visites institutionnelles causant de la détresse surajoutée aux familles                                                                            | <input type="checkbox"/> | <input type="checkbox"/> | <input type="checkbox"/> |
| Patients postponing their ED visit due to fear of contracting COVID-19 / Patients qui retardent leur visite à l'urgence par crainte de contracter la COVID-19                                                                                                     | <input type="checkbox"/> | <input type="checkbox"/> | <input type="checkbox"/> |
| Patients visiting the ED because they are unable to access their primary care practitioner due to changes in clinical practices / Patients qui visitent l'urgence parce qu'ils sont incapables de voir leur médecin traitant suite à des changements de pratiques | <input type="checkbox"/> | <input type="checkbox"/> | <input type="checkbox"/> |
| Patients experiencing complications due to decreases in available healthcare services / Patients qui ont des complications suite à la diminution des services de soins disponibles                                                                                | <input type="checkbox"/> | <input type="checkbox"/> | <input type="checkbox"/> |
| Patients and families lying about risk factors for having COVID-19 / Patients et familles qui mentent au sujet de leurs facteurs de risques d'avoir la COVID-19                                                                                                   | <input type="checkbox"/> | <input type="checkbox"/> | <input type="checkbox"/> |
| Other ethical issues (please specify) / Autres enjeux éthiques (SVP préciser)                                                                                                                                                                                     | <input type="checkbox"/> | <input type="checkbox"/> | <input type="checkbox"/> |

---

Please specify: / SVP précisez :

---



**SECTION 2 : OPINIONS**

- 1 How much do you believe access to treatments for COVID-19 should be prioritized for healthcare professionals? / Pensez-vous que l'accès aux traitements pour la COVID-19 devrait être priorisé pour les professionnels de la santé ?

Absolutely  
prioritised /  
<font

Not at all  
prioritised /  
<font

color=black>Pas du tout priorisé =black>Absolument priorisé

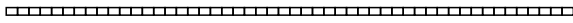

(Place a mark on the scale above)

- 2 How much do you believe access to treatments for COVID-19 should be prioritized for healthcare professionals' families? / Pensez-vous que l'accès aux traitements pour la COVID-19 devrait être priorisé pour les familles des professionnels de la santé ?

Absolutely  
prioritised /  
<font

Not at all  
prioritised /  
<font

color=black>Pas du tout priorisé =black>Absolument priorisé

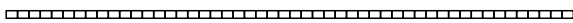

(Place a mark on the scale above)

- 3 How much do you believe access to vaccines for COVID-19 should be prioritized for healthcare professionals? / Pensez-vous que l'accès aux vaccins pour la COVID-19 devrait être priorisé pour les professionnels de la santé ?

Absolutely  
prioritised /  
<font

Not at all  
prioritised /  
<font

color=black>Pas du tout priorisé =black>Absolument priorisé

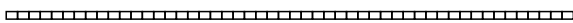

(Place a mark on the scale above)

- 4 How much do you believe access to vaccines for COVID-19 should be prioritized for healthcare professionals' families? / Pensez-vous que l'accès aux vaccins pour la COVID-19 devrait être priorisé pour les familles des professionnels de la santé ?

Absolutely  
prioritised /  
<font

Not at all  
prioritised /  
<font

color=black>Pas du tout priorisé =black>Absolument priorisé

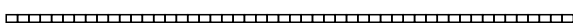

(Place a mark on the scale above)

- 5 How concerned are you about having to allocate limited numbers of intensive care beds or ventilators to patients during this pandemic?  
À quel point êtes-vous préoccupé d'avoir à allouer un nombre limité de lits de soins intensifs ou de ventilateurs à des patients pendant la pandémie ?

Extremely  
concerned / <font

Not at all  
concerned / <font  
color=black>Pas

du tout

préoccupé<font  
color=white>

Extremement  
préoccupé

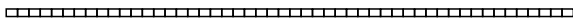

(Place a mark on the scale above)

Please comment if you wish / Veuillez SVP commenter au besoin :

- 6 Are you aware of any provincial or national guidelines to help you deal with the allocation of limited resources during this pandemic?  
Êtes-vous au courant de lignes directrices provinciales ou nationales pour vous aider avec l'allocation de ressources limitées pendant cette pandémie ?

- No / Non  
 Yes / Oui

Please name them:  
Veuillez SVP les nommer :

- 7 As an ED physician, do you believe your professional code requires you to care for patients during this pandemic?  
En tant que médecin d'urgence, croyez-vous que votre code professionnel requiert que vous soigniez les patients pendant la pandémie ?

- No / Non  
 Yes / Oui  
 I don't know / Je ne sais pas

- 8 As an ED physician, do you believe your professional code requires you to protect yourself during this pandemic?  
En tant que médecin d'urgence, croyez-vous que votre code professionnel requiert que vous vous protégiez pendant la pandémie ?

- No / Non  
 Yes / Oui  
 I don't know / Je ne sais pas

- 9 As an ED physician, how strongly do you believe you have a moral responsibility to care for patients during this pandemic?  
En tant que médecin d'urgence, dans quelle mesure croyez-vous que vous avez une responsabilité morale de soigner les patients pendant la pandémie ?

No responsibility

/

responsabilité

Aucune

Strong

responsibility /

/

responsabilité

responsabilité

color=white>

Responsabilité

importante

(Place a mark on the scale above)

- 10 How concerned were you about a lack of proper PPE in your ED?  
Dans quelle mesure avez-vous été inquiet de manquer d'EPI appropriés dans votre urgence ?

Not concerned at

all

Pas

inquiet du

tout

color=white>

Extremely

concerned

color=black>

Extrêmement

inquiet

(Place a mark on the scale above)

- 11 Have you knowingly provided care to patients without wearing the full recommended PPE during this pandemic?  
Pendant cette pandémie, avez-vous consciemment prodigué des soins à des patients sans porter l'EPI recommandé complet ?

- Never / Jamais  
 Sometimes / Parfois  
 Often / Souvent

**SECTION 3 : EXPERIENCES**

1 Please name the three (3) emotions you have felt most often during this pandemic:  
SVP nommez les trois (3) émotions que vous avez ressenties le plus souvent au cours de cette pandémie :

1. \_\_\_\_\_

2. \_\_\_\_\_

3. \_\_\_\_\_

**SECTION 3 : EXPERIENCES**

**2. Please rate the following personal concerns from 'not concerned' to 'very concerned' during this pandemic:**

**SVP évaluez votre degré de préoccupation personnelle de 'pas préoccupé' à 'très préoccupé' pendant cette pandémie :**

|                                                                                                                                                               | Not concerned/ Pas<br>préoccupé | Slightly concerned/<br>Un peu préoccupé | Concerned/<br>Préoccupé | Very concerned/ Très<br>préoccupé |
|---------------------------------------------------------------------------------------------------------------------------------------------------------------|---------------------------------|-----------------------------------------|-------------------------|-----------------------------------|
| Your physical health / Votre<br>santé physique                                                                                                                | <input type="radio"/>           | <input type="radio"/>                   | <input type="radio"/>   | <input type="radio"/>             |
| Your mental health / Votre santé<br>mentale                                                                                                                   | <input type="radio"/>           | <input type="radio"/>                   | <input type="radio"/>   | <input type="radio"/>             |
| Your family's physical health / La<br>santé physique de votre famille                                                                                         | <input type="radio"/>           | <input type="radio"/>                   | <input type="radio"/>   | <input type="radio"/>             |
| Your family's mental health / La<br>santé mentale de votre famille                                                                                            | <input type="radio"/>           | <input type="radio"/>                   | <input type="radio"/>   | <input type="radio"/>             |
| Acquiring the COVID-19 infection<br>at work and transmitting it to<br>your family / Contracter la<br>COVID-19 au travail et la<br>transmettre à votre famille | <input type="radio"/>           | <input type="radio"/>                   | <input type="radio"/>   | <input type="radio"/>             |
| Transmitting the COVID-19<br>infection to patients/<br>Transmettre la COVID-19 à vos<br>patients                                                              | <input type="radio"/>           | <input type="radio"/>                   | <input type="radio"/>   | <input type="radio"/>             |
| Transmitting the COVID-19<br>infection to your work<br>colleagues/ Transmettre la<br>COVID-19 à vos collègues de<br>travail                                   | <input type="radio"/>           | <input type="radio"/>                   | <input type="radio"/>   | <input type="radio"/>             |
| The quality of your patients' care<br>/ La qualité des soins de vos<br>patients                                                                               | <input type="radio"/>           | <input type="radio"/>                   | <input type="radio"/>   | <input type="radio"/>             |
| The pandemic's impact on your<br>personal financial situation /<br>L'impact de la pandémie sur<br>votre situation financière<br>personnelle                   | <input type="radio"/>           | <input type="radio"/>                   | <input type="radio"/>   | <input type="radio"/>             |
| The impact of isolation measures<br>on children and youth's health /<br>L'impact des mesures<br>d'isolement sur la santé des<br>enfants et adolescents        | <input type="radio"/>           | <input type="radio"/>                   | <input type="radio"/>   | <input type="radio"/>             |

The potential for a second wave of pandemic / Le potentiel d'une deuxième vague de pandémie

The pandemic's impact on Canada's financial situation / L'impact de la pandémie sur la situation financière du Canada

The pandemic's impact on worldwide solidarity and cooperation / L'impact de la pandémie au niveau de la solidarité et de la coopération mondiales

Other (please specify) / Autre (préciser)

---

If other, please specify:  
Autre, svp préciser :

\_\_\_\_\_

**SECTION 3 : EXPERIENCES**

3 What has been most useful to care for your mental health and/or wellness during this pandemic?  
Qu'est-ce qui a été le plus utile pour prendre soin de votre santé mentale et/ou de votre bien-être pendant cette pandémie ?

4 Have you sought support for mental health concerns during this pandemic? / Avez-vous consulté une ressource en santé mentale pendant cette pandémie ?

- No / Non  
 Yes / Oui  
 Prefer not to answer / Préfère ne pas répondre

Please identify the resource(s) you reached out to: (check all that apply) / SVP identifiez la(les) ressource(s) consultée(s) : (cochez toutes les réponses appropriées)

- Private practice mental health professional / Professionnel en santé mentale en pratique privée  
 Hospital telephone hotline set up for this pandemic / Ligne téléphonique hospitalière instaurée pour cette pandémie  
 Provincial physician health program / Programme provincial de santé des médecins  
 Other (please specify) / Autre (SVP préciser)

Other mental health resource: / Autre ressource en santé mentale : \_\_\_\_\_

Did you find this/these resource(s) helpful? / Est-ce que vous avez trouvé cette/ces ressource(s) aidante(s) ?

- No / Non  
 Yes / Oui

5 Are you suffering from information fatigue?  
Souffrez-vous de fatigue de l'information ?

- No, not at all / Non, pas du tout  
 Yes, a little / Oui, un peu  
 Yes, a lot / Oui, beaucoup

**SECTION 3 : EXPERIENCES**

**6. What is the best way to educate physicians during a pandemic? Please rank your preferences among the following.**

**Quelle est la meilleure façon d'éduquer les médecins pendant une pandémie ? SVP priorisez vos préférences parmi les choix suivants.**

|                                                               | 1 Best way /<br>Meilleure façon | 2                     | 3                     | 4                     | 5 Worst way /<br>Pire façon |
|---------------------------------------------------------------|---------------------------------|-----------------------|-----------------------|-----------------------|-----------------------------|
| Simulation                                                    | <input type="radio"/>           | <input type="radio"/> | <input type="radio"/> | <input type="radio"/> | <input type="radio"/>       |
| Videos available online / Vidéos disponibles en ligne         | <input type="radio"/>           | <input type="radio"/> | <input type="radio"/> | <input type="radio"/> | <input type="radio"/>       |
| Weekly teleconference rounds / Visioconférences hebdomadaires | <input type="radio"/>           | <input type="radio"/> | <input type="radio"/> | <input type="radio"/> | <input type="radio"/>       |
| E-mails / Courriels                                           | <input type="radio"/>           | <input type="radio"/> | <input type="radio"/> | <input type="radio"/> | <input type="radio"/>       |
| Other (please specify) / Autre (SVP préciser)                 | <input type="radio"/>           | <input type="radio"/> | <input type="radio"/> | <input type="radio"/> | <input type="radio"/>       |

Other / Autre :

---



**SECTION 4 : DEMOGRAPHIC INFORMATION / INFORMATION DÉMOGRAPHIQUE**

- 1 What province do you practice in?  
Dans quelle province pratiquez-vous ?
- British Columbia / Colombie Britannique  
 Alberta  
 Saskatchewan  
 Manitoba  
 Ontario  
 Quebec  
 New Brunswick / Nouveau Brunswick  
 Newfoundland & Labrador / Terre-Neuve & Labrador  
 Nova Scotia / Nouvelle Écosse  
 Prince Edward Island / Ile du Prince Édouard  
 Northwest Territories / Territoires du Nord-Ouest  
 Nunavut  
 Yukon  
 Other
- 
- 2 Which of the following options best describes your highest level of training?  
Laquelle des options suivantes décrit au mieux votre plus haut niveau de formation ?
- General Pediatrics / Pédiatrie Générale  
 Royal College Emergency Medicine training / Médecine d'Urgence (Collège Royal)  
 CCFP Emergency Medicine training / Médecine d'Urgence (CCMF)  
 Pediatric Emergency / Urgence Pédiatrique  
 Currently in fellowship or training / Présentement en formation ou fellowship  
 Other training / Autre formation
- 
- 3 What is your sex?  
Quel est votre sexe ?
- Male / Homme  
 Female / Femme  
 Decline to answer / Préfère ne pas répondre
- 
- 4 What is your age?  
Quel est votre âge ?
- 20-29  
 30-39  
 40-49  
 50-59  
 60-69  
 70+
- 
- 5 How many years have you worked in clinical practice as an attending physician?  
Depuis combien d'années travaillez-vous en clinique comme patron ?
- Still in training / Formation en cours  
 0-4 years/années  
 5-9 years/années  
 10-19 years/années  
 20-29 years/années  
 30+ years/années
- 
- 6 What percentage of patients in your practice are under the age of 18 years?  
Quelle proportion de patients dans votre pratique ont moins de 18 ans ?
- 0-25%  
 26-50%  
 51-75%  
 76-100%
- 
- 7 To your knowledge, have you contracted COVID-19 (confirmed by swab)?  
À votre connaissance, avez-vous contracté la COVID-19 (confirmé par test de laboratoire) ?
- No/Non  
 Yes/Oui  
 I don't know/Je ne sais pas
- 
- Were you hospitalised?  
Avez-vous été hospitalisé ?
- No/Non  
 Yes/Oui

- 
- 8 Do you have any of the risk factors believed to increase the medical complications of COVID-19? (For example: more advanced age, pregnancy, chronic cardiovascular illness, chronic respiratory illness, immunosuppression or immunodeficiency)  
Avez-vous au moins un des facteurs de risque augmentant les risques de complications médicales liées à la COVID-19 ? (Par exemple : age plus avancé, grossesse, maladie cardiovasculaire chronique, maladie pulmonaire chronique, immunosuppression ou immunodéficience).

No / Non  
 Yes / Oui

---

Given this risk factor, did you modify your clinical practice during this pandemic? / Compte-tenu de ce facteur de risque, avez-vous modifié votre pratique clinique pendant cette pandémie ?

No / Non  
 Yes / Oui

---

Please explain your answer/ Veuillez SVP expliquer votre réponse :

- 
- 9 Were you told to self-isolate during this pandemic?  
Est-ce qu'on vous a recommandé de vous isoler pendant cette pandémie ?

No / Non  
 Yes / Oui

---

Please explain why: / Veuillez expliquer pourquoi :

- 
- 10 During this pandemic, has your partner been working in an essential service?  
Pendant cette pandémie, est-ce que votre conjoint(e) a travaillé dans un service essentiel ?
- No/Non  
 Yes/Oui  
 Not applicable/Non applicable

---

Does your partner work in healthcare?  
Est-ce que votre conjoint(e) travaille en santé ?

No / Non  
 Yes / Oui

- 
- 11 Do you have children?  
Avez-vous un/des enfant(s) ?

No / Non  
 Yes / Oui

- 
- 12 Are minors or elderly people living at the same address as you during this pandemic?  
Est-ce que des personnes mineures ou âgées vivent à la même adresse que vous pendant cette pandémie ?

No / Non  
 Yes / Oui

- 
- 13 Do you have experience working in a previous pandemic or outbreak?  
Avez-vous une expérience de travail dans une pandémie ou écloison antérieure ?
- No / Non  
 Yes in Canada / Oui au Canada  
 Yes internationally / Oui à l'international  
 Yes in Canada and internationally / Oui au Canada et à l'international

---

Please identify the outbreak(s):  
SVP identifiez cette/ces éclo(sion)s :

- MERS-CoV  
 SARS / SRAS  
 Influenza A H1N1  
 Ebola  
 Other / Autre

---

If other, please specify:  
Si autre, SVP préciser :

---

---

Thank you for completing this survey. If you are concerned about your clinical practice, we encourage you to consult the CMPA for assistance. If you are experiencing distress, fatigue or other concerning feelings or symptoms, we encourage you to reach out to institutional or provincial resources available to physicians during these difficult times. For a list of Provincial health programs visit this website: <https://www.cma.ca/provincial-physician-health-program>.

Merci d'avoir complété ce sondage. Si vous avez des inquiétudes au sujet de votre pratique clinique, nous vous encourageons à contacter l'ACPM. Si vous vivez de la détresse, de la fatigue ou des symptômes inquiétants, nous vous encourageons à consulter les ressources institutionnelles ou provinciales disponibles pour les médecins en ces temps difficiles. Pour une liste des Programmes provinciaux de santé visitez le site web : <https://www.cma.ca/fr/programme-provincial-de-sante-des-medecins>.
